# Supplementary material for: Xeno-Free Condition Enhances Therapeutic Functions of Human Wharton’s Jelly-Derived Mesenchymal Stem Cells against Experimental Colitis by Upregulated Indoleamine 2,3-Dioxygenase Activity
Source: PubMed Central journal article supplement (PMC7565923; doi:10.3390/jcm9092913), 2020-09-10
Supplement: jcm-09-02913-s001.pdf [file jcm-09-02913-s001.pdf]

# Supplementary Figure 1

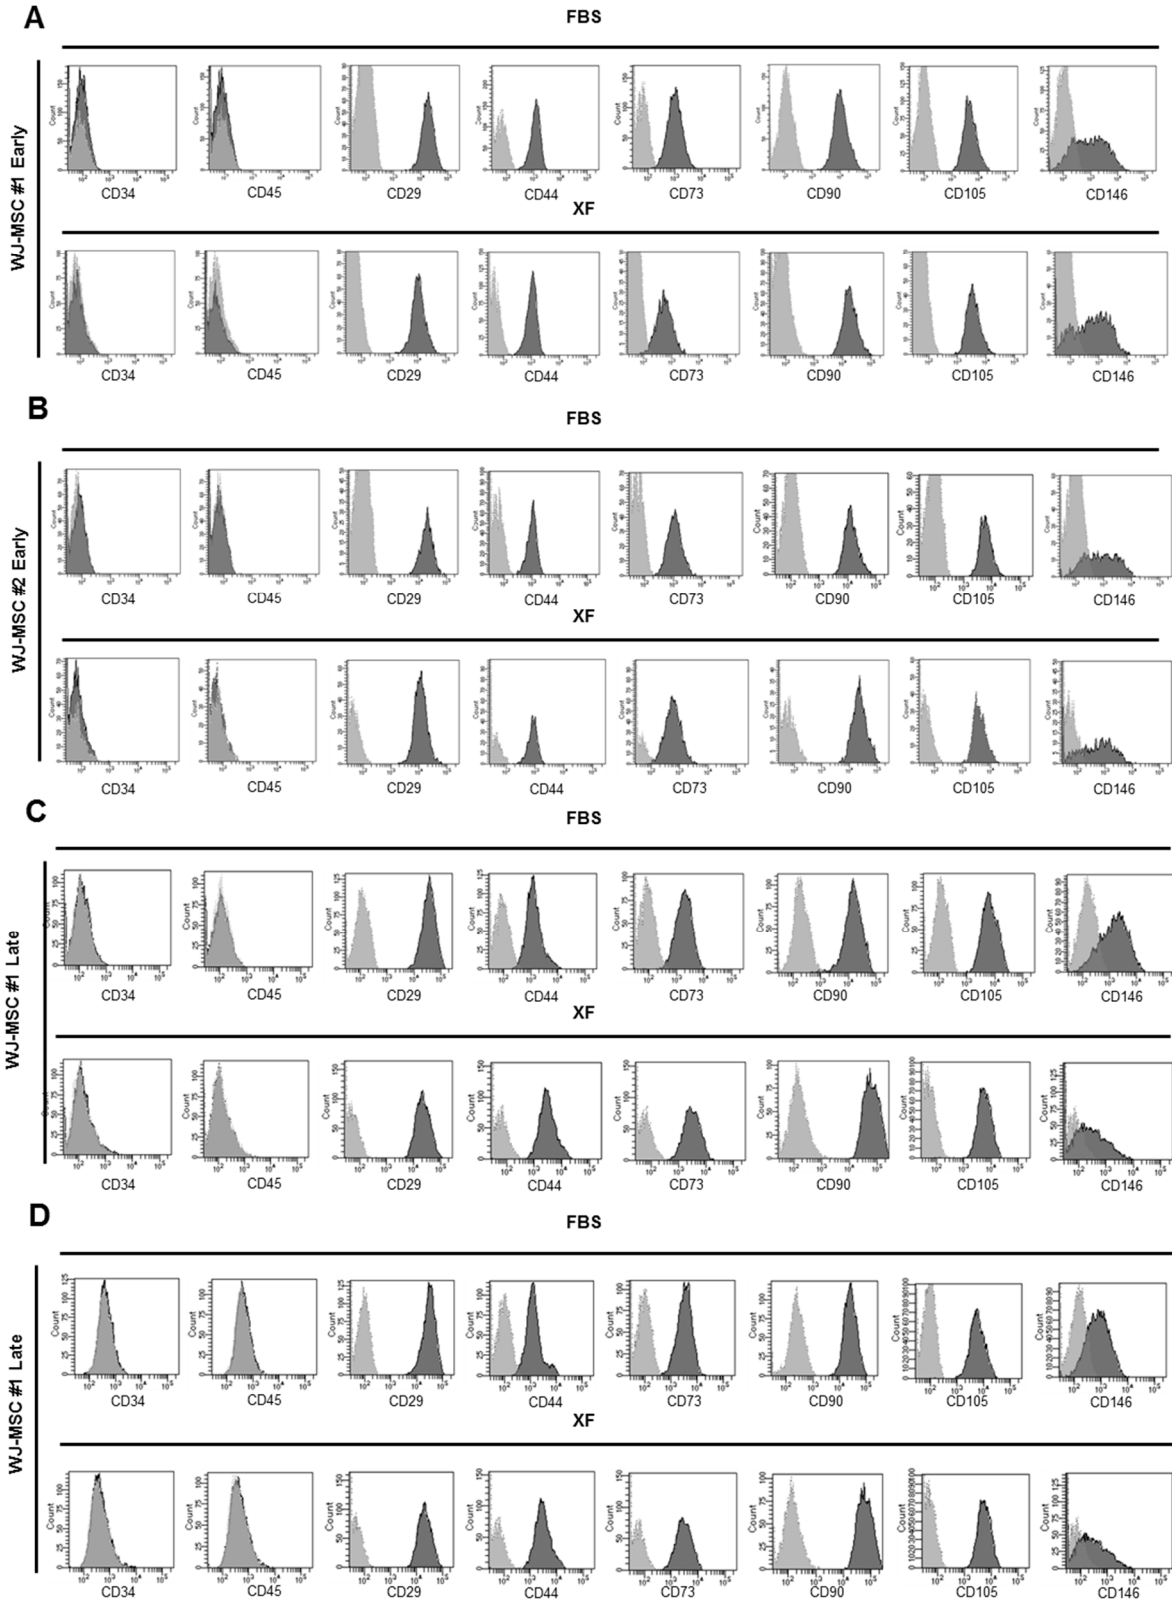

Supplementary Figure 1. Cell surface markers of WJ-MSCs cultured in FBS and XF conditions.

Cell surface markers of WJ-MSCs cultured in FBS and XF conditions were measured by flow cytometry for the expression of the MSCs specific antigen CD29, CD44, CD73, CD90, CD105, CD146 and CD34, CD45.

## Supplementary Figure 2

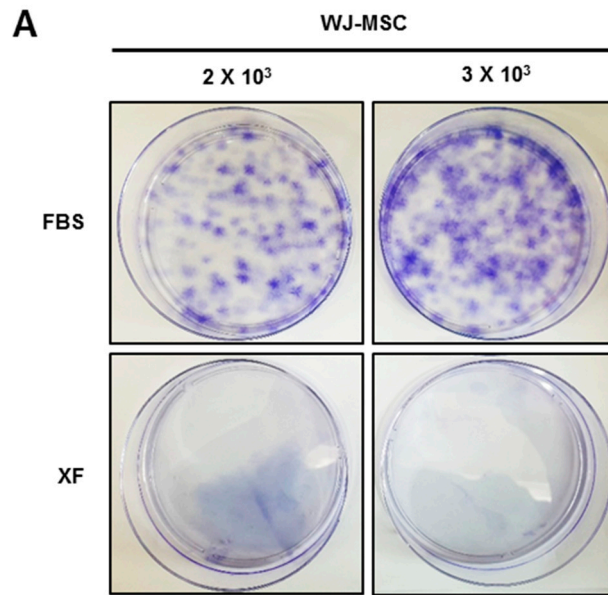

**Supplementary Figure 2.** Colony-forming unit-fibroblast (CFU-F) assay of WJ-MSCs cultured in FBS and XF conditions.

(A) WJ-MSCs cultured in FBS or XF conditions were seeded in 100mm culture dish and then stained with 1% crystal violet 14 days.

## Supplementary Figure 3

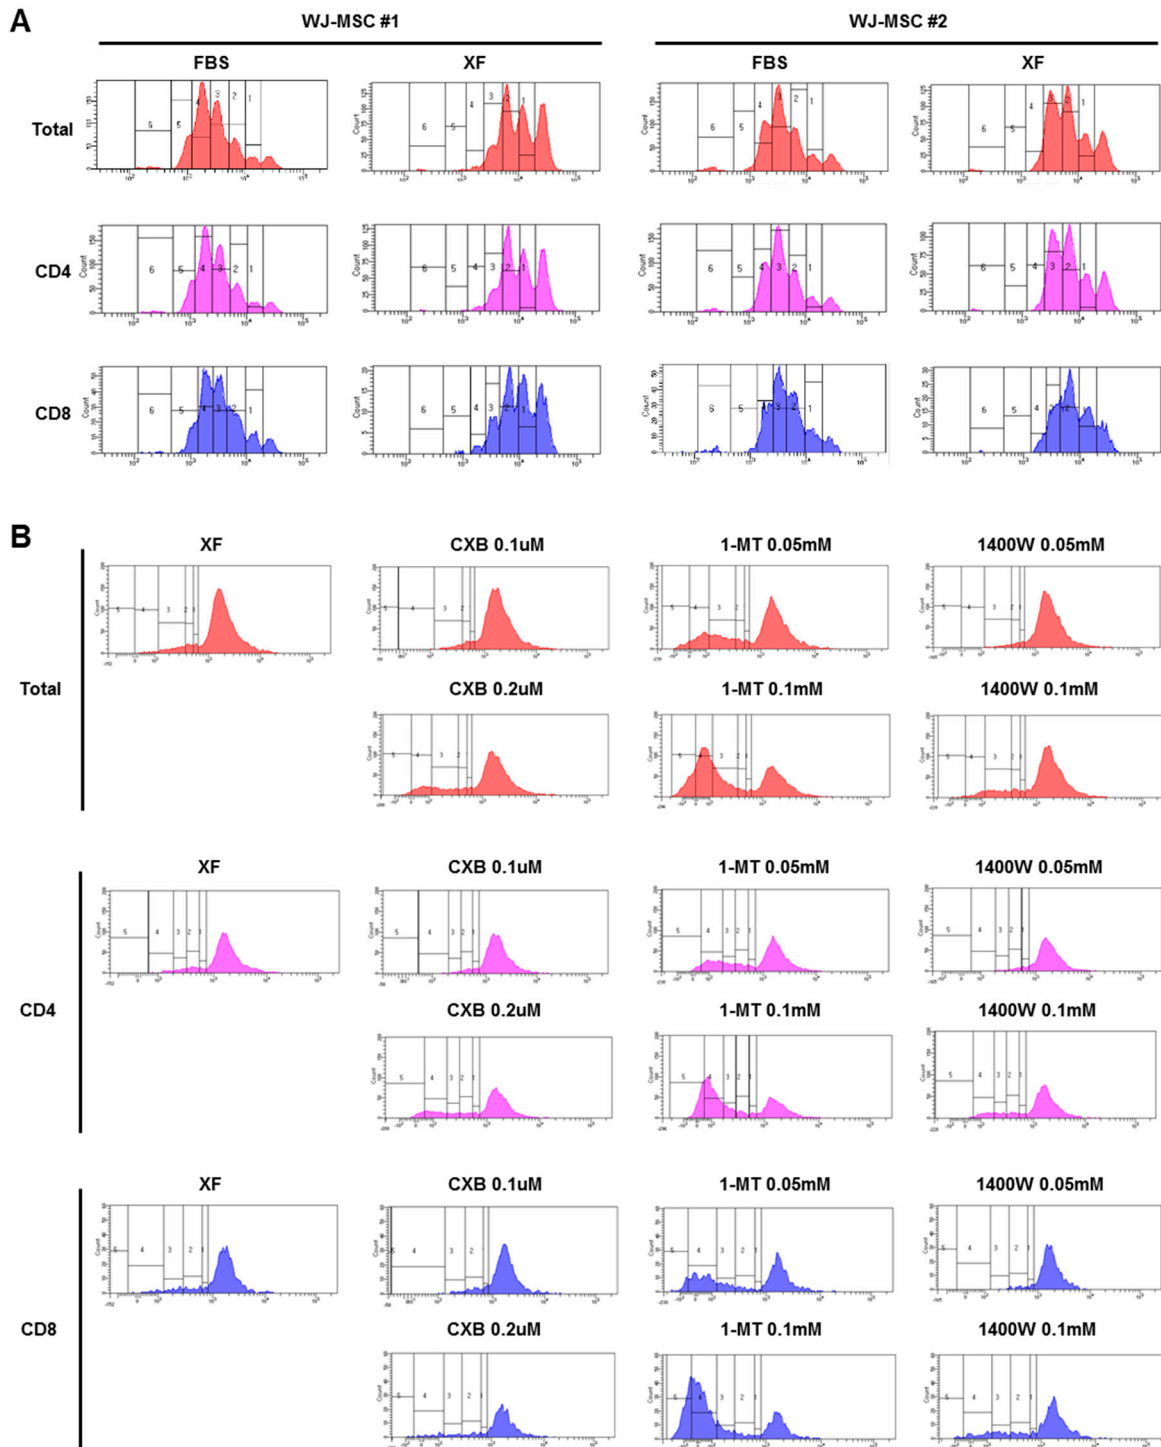

Supplementary Figure 3. Track cell division in the distinct compartments using CFSE staining.

(A) Activated T cells were cultured with 10%-MSCs or XF-MSCs for 6 days. T subsets were stained with anti-CD3, anti-CD4, and anti-CD8 and analyzed by flow cytometry. The fluorescence profile of CFSE-labeled cells was identified by six divisions. (B) After treating XF-MSCs with the celecoxib, 1-MT or 1400W at the indicated dose, the cells were incubated with activated T cells. Proliferation of the total T, CD4+ T and CD8+ T cells was measured by flow cytometry, and the fluorescence profile of CFSE-labeled cells was identified by five divisions. The results show representative of independent experiments performed at least three times.

## Supplementary Figure 4

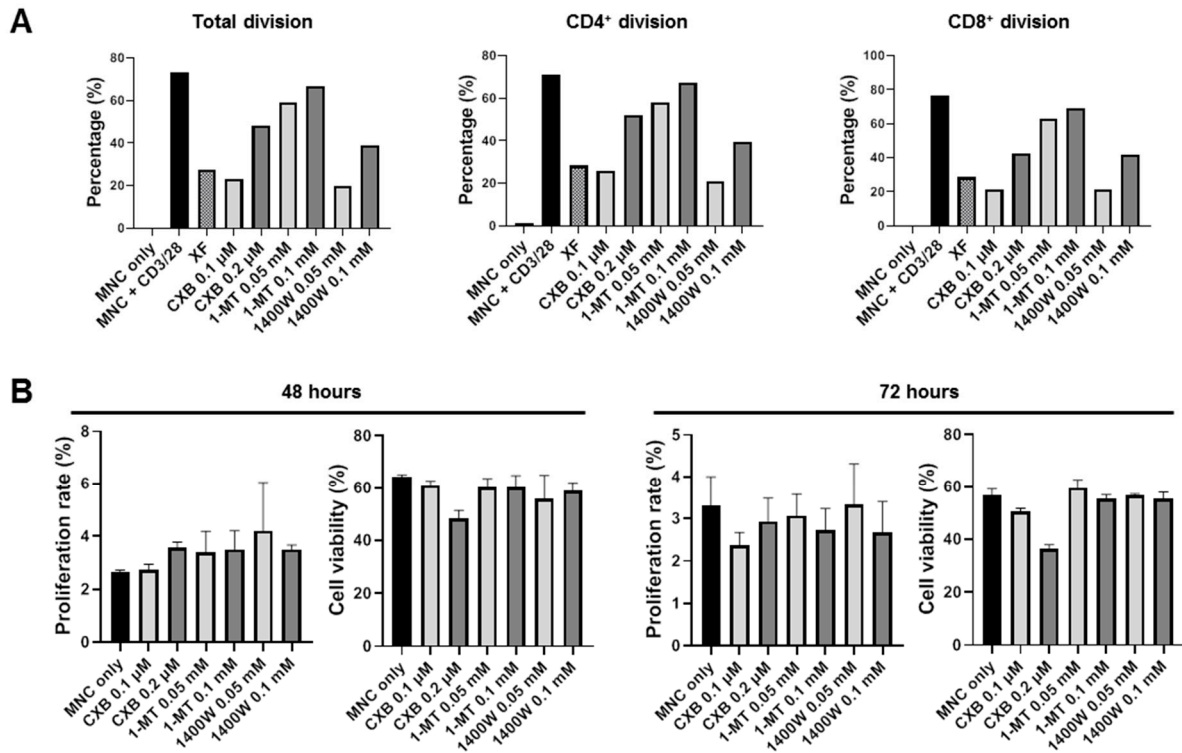

**Supplementary Figure 4.** Regulation of the immunosuppressive effect of XF-MSCs by IDO.

(A) After treating XF-MSCs with the celecoxib, 1-MT or 1400W at the indicated dose, the cells were incubated with activated T cells (PBMCs donor#2). Proliferation rate of the total T, CD4<sup>+</sup> T and CD8<sup>+</sup> T cells was quantified. (B) CFSE-labeled PBMCs were treated with the celecoxib, 1-MT or 1400W for 48 and 72 hours, and then stained with 7AAD. Flow cytometry was determined to assess PBMCs proliferation and cell viability
